# Supplementary material
Source: Springer Nature journal article supplement (https://www.springermedizin.de/resource/supplementary/12958_2005_299_MOESM1_ESM.pdf/9567570)
Supplement: MOESM1 [file 9567570]

**Genotype or Environment**

**Prenatal Androgen Excess**

**Metabolic consequence**

**Reproductive consequence**

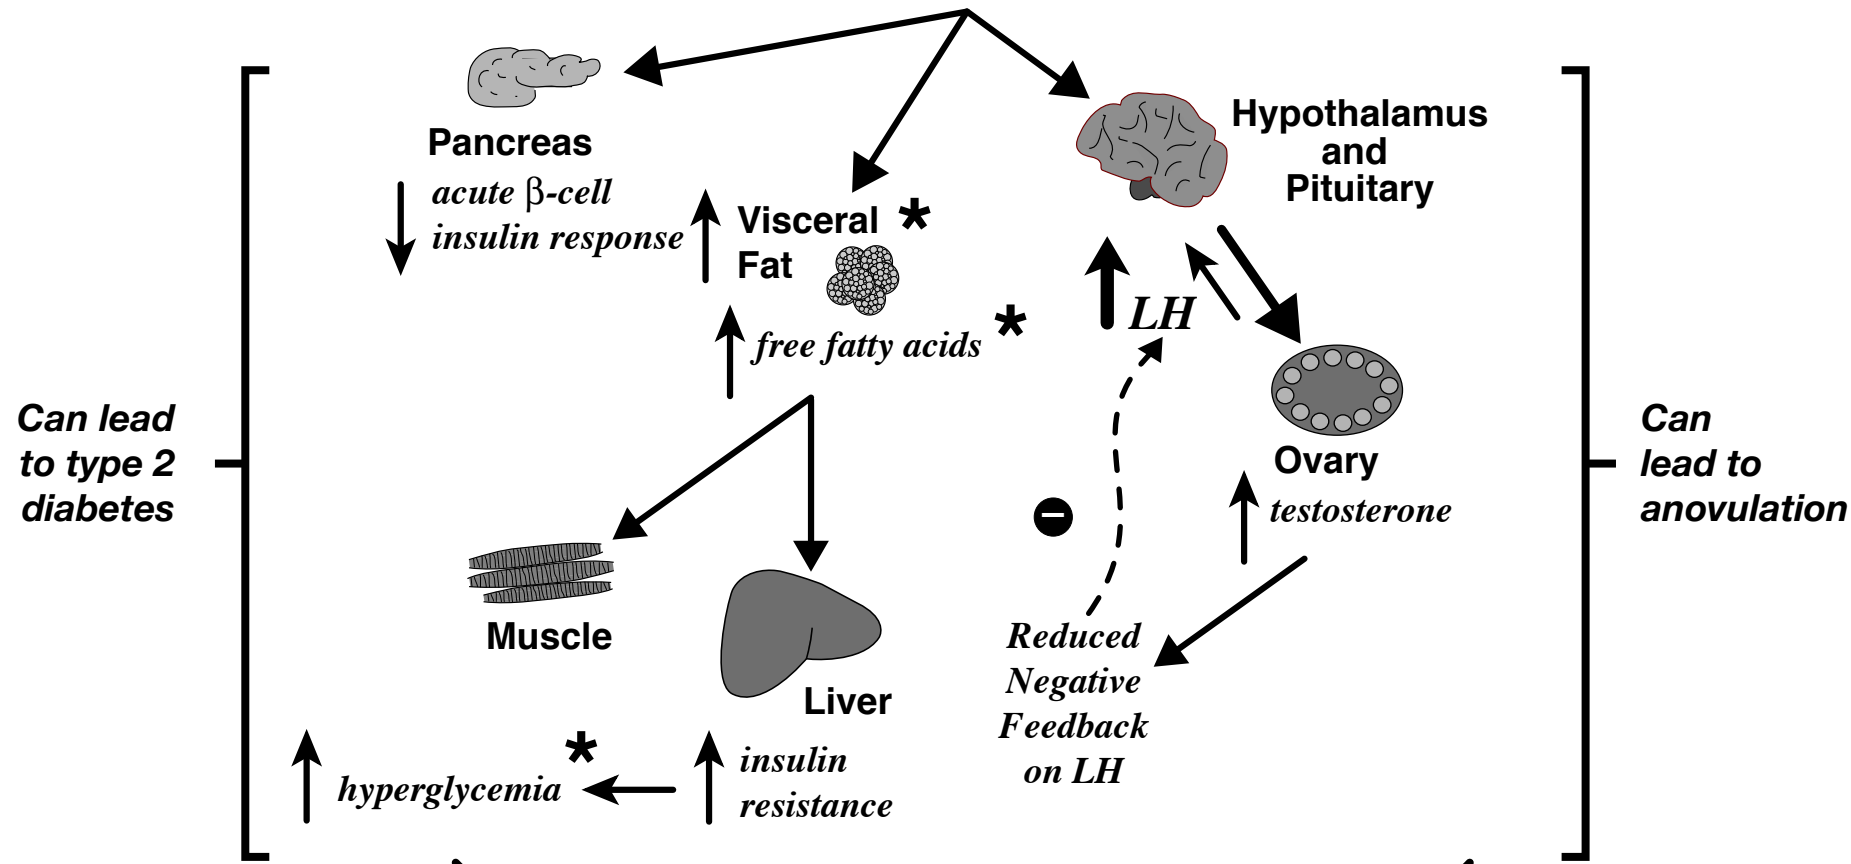

Can lead to type 2 diabetes

Can lead to anovulation

**\* Metabolic syndrome phenotype**

**Adult PCOS phenotype**
